# Supplementary material for: Honeycomb porous films of pentablock copolymer on liquid substrates via breath figure method and their hydrophobic properties with static and dynamic behaviour
Source: Royal Society of Chemistry journal article supplement (doi:10.1039/c5ra00066a), 2015-01-01
Supplement: c5ra00066a1.pdf [file c5ra00066a1.pdf]

## Honeycomb porous films of pentablock copolymer on liquid substrates *via* breath figure method and their hydrophobic properties with static and dynamic behaviour

Zhiguang Li,<sup>a,b</sup> Xiaoyan Ma,<sup>\*a,b</sup> Duyang Zang,<sup>a,b</sup> Qing Hong<sup>a,b</sup> and Xinghua Guan<sup>a,b</sup>

<sup>a</sup> Key Laboratory of Space Applied Physics and Chemistry, Ministry of Education, Shaanxi province, School of Science, Northwestern Polytechnical University, Xi'an 710129, China. Tel: +86-29-88431676 E-mail: [m\\_xiao\\_yana@nwpu.edu.cn](mailto:m_xiao_yana@nwpu.edu.cn) ;

<sup>b</sup> Key Laboratory of Polymer Science and Technology, Shaanxi province, School of Science, Northwestern Polytechnical University, Xi'an, 710129, China.

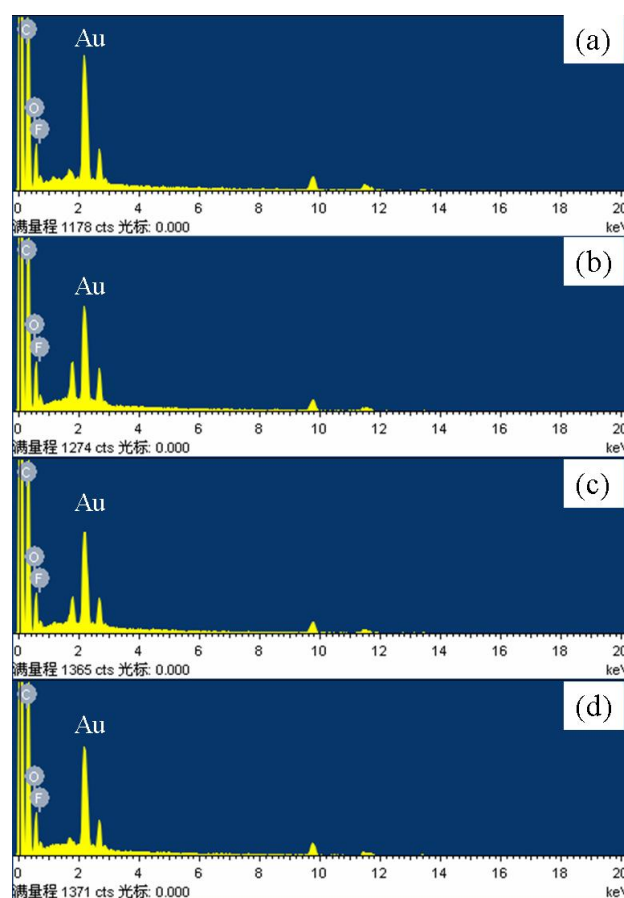

Fig. S1 EDS analyses of the porous films obtained from different substrates. (a) formic acid, (b) ethylene glycol, (c) ethanol and (d) isopropanol.

Table S1 The chemical compositions of the films obtained from different substrates through EDS

| substrate             | formic acid | ethylene glycol | ethanol | isopropanol |
|-----------------------|-------------|-----------------|---------|-------------|
| fluorinate content, % | 34.53       | 34.61           | 34.26   | 34.36       |
| carbon content, %     | 17.72       | 17.25           | 18.64   | 17.70       |
| oxygen content, %     | 47.75       | 48.14           | 47.10   | 47.94       |
